# Supplementary material for: Microbial community changes correlate with impaired host fitness of Aurelia aurita after environmental challenge
Source: Springer Nature journal article supplement (doi:10.1186/s42523-023-00266-4), 2023-09-21
Supplement: MOESM1 [file 42523_2023_266_MOESM1_ESM.pdf]

# **Microbial community changes correlate with impaired host fitness of *Aurelia aurita* after environmental challenge**

Nicole Pinnow<sup>1,#</sup>, Cynthia M. Chibani<sup>1</sup>, Simon Güllert<sup>1,†</sup>, and Nancy Weiland-Bräuer<sup>1,#,\*</sup>

<sup>1</sup> Kiel University, General Microbiology, Am Botanischen Garten 1-9, 24118 Kiel, Germany

# Joint first authors

† Current address: Sysmex Inostics GmbH, Falkenried 88, 20251 Hamburg, Germany

\* Correspondence: [nweiland@ifam.uni-kiel.de](mailto:nweiland@ifam.uni-kiel.de); Tel.: , 49-431-880-1649 (Germany)

Keywords: metaorganism, *Aurelia aurita*, environment, climate change, microbiome, acclimatization, salinity, temperature, future ocean

**Tab. S1: Pairwise result of Log-rank test for survival.** Log-rank test was used with the survival library (<https://cran.r-project.org/web/packages/survival/index.html>). Kaplan Meier test produced % of survival rates, chi-squares, and calculated the listed p-values for significance (< 0.05). Significance levels \*, < 0.05; \*\*, < 0.01; ns, not significant.

**fitness trait: survival**

| comparison              |                          | p-value | significance |
|-------------------------|--------------------------|---------|--------------|
| native normal           | sterile normal           | 0.300   | ns           |
| native normal           | native high salinity     | 0.250   | ns           |
| native normal           | native high temperature  | 0.003   | **           |
| native normal           | native future ocean      | 0.400   | ns           |
| sterile normal          | sterile high salinity    | 0.020   | *            |
| sterile normal          | sterile high temperature | 0.010   | *            |
| sterile normal          | sterile future ocean     | 0.200   | ns           |
| native high salinity    | sterile high salinity    | 0.030   | *            |
| native high temperature | sterile high temperature | 0.600   | ns           |
| native future ocean     | sterile future ocean     | 0.200   | ns           |

**Tabs. S2-S6: PERMANOVA tests.** Multivariate statistics were conducted using R for each fitness trait and the treatments growth, feeding, budding, segmentation, and ephyrae release for native and sterile conditions. PERMANOVA p-values are depicted with their corresponding significance levels \*, < 0.05; \*\*, < 0.01; \*\*\*, < 0.001; ns, not significant. PERMANOVA settings included Permutation test for adonis under reduced model, free Permutation, and 9999 No. of permutations adonis2.

**Tab. S2**

**fitness trait: growth**

|                         | comparison               | p-value | significance |
|-------------------------|--------------------------|---------|--------------|
| native normal           | sterile normal           | 0.001   | ***          |
| native normal           | native high salinity     | 0.001   | ***          |
| native normal           | native high temperature  | 0.001   | ***          |
| native normal           | native future ocean      | 0.001   | ***          |
| sterile normal          | sterile high salinity    | 0.001   | ***          |
| sterile normal          | sterile high temperature | 0.001   | ***          |
| sterile normal          | sterile future ocean     | 0.002   | **           |
| native high salinity    | sterile high salinity    | 0.001   | ***          |
| native high temperature | sterile high temperature | 0.012   | *            |
| native future ocean     | sterile future ocean     | 0.042   | *            |

**Tab. S3**

**fitness trait: feeding**

|                         | comparison               | p-value | significance |
|-------------------------|--------------------------|---------|--------------|
| native normal           | sterile normal           | 0.896   | ns           |
| native normal           | native high salinity     | 0.030   | *            |
| native normal           | native high temperature  | 0.036   | *            |
| native normal           | native future ocean      | 0.592   | ns           |
| sterile normal          | sterile high salinity    | 0.010   | **           |
| sterile normal          | sterile high temperature | 0.010   | **           |
| sterile normal          | sterile future ocean     | 0.016   | *            |
| native high salinity    | sterile high salinity    | 0.596   | ns           |
| native high temperature | sterile high temperature | 0.498   | ns           |
| native future ocean     | sterile future ocean     | 0.110   | ns           |

**Tab. S4**

**fitness trait: budding**

|                | comparison              | p-value | significance |
|----------------|-------------------------|---------|--------------|
| native normal  | sterile normal          | 0.001   | ***          |
| native normal  | native high salinity    | 0.001   | ***          |
| native normal  | native high temperature | 0.001   | ***          |
| native normal  | native future ocean     | 0.001   | ***          |
| sterile normal | sterile high salinity   | 0.001   | ***          |

|                         |                          |       |     |
|-------------------------|--------------------------|-------|-----|
| sterile normal          | sterile high temperature | 0.001 | *** |
| sterile normal          | sterile future ocean     | 0.001 | *** |
| native high salinity    | sterile high salinity    | 0.775 | ns  |
| native high temperature | sterile high temperature | 0.001 | *** |
| native future ocean     | sterile future ocean     | 0.010 | **  |

**Tab. S5**

**fitness trait: segmentation**

| comparison              |                          | p-value | significance |
|-------------------------|--------------------------|---------|--------------|
| native normal           | sterile normal           | 0.001   | ***          |
| native normal           | native high salinity     | 0.001   | ***          |
| native normal           | native high temperature  | 0.001   | ***          |
| native normal           | native future ocean      | 0.001   | ***          |
| sterile normal          | sterile high salinity    | 0.001   | ***          |
| sterile normal          | sterile high temperature | 0.001   | ***          |
| sterile normal          | sterile future ocean     | 0.001   | ***          |
| native high salinity    | sterile high salinity    | 0.002   | **           |
| native high temperature | sterile high temperature | 0.001   | ***          |
| native future ocean     | sterile future ocean     | 0.007   | **           |

**Tab. S6**

**fitness trait: ephyrae release**

| comparison              |                          | p-value | significance |
|-------------------------|--------------------------|---------|--------------|
| native normal           | sterile normal           | 0.001   | ***          |
| native normal           | native high salinity     | 0.001   | ***          |
| native normal           | native high temperature  | 0.001   | ***          |
| native normal           | native future ocean      | 0.001   | ***          |
| sterile normal          | sterile high salinity    | 0.002   | **           |
| sterile normal          | sterile high temperature | 0.001   | ***          |
| sterile normal          | sterile future ocean     | 0.001   | ***          |
| native high salinity    | sterile high salinity    | 0.003   | **           |
| native high temperature | sterile high temperature | 0.897   | ns           |
| native future ocean     | sterile future ocean     | 0.002   | **           |

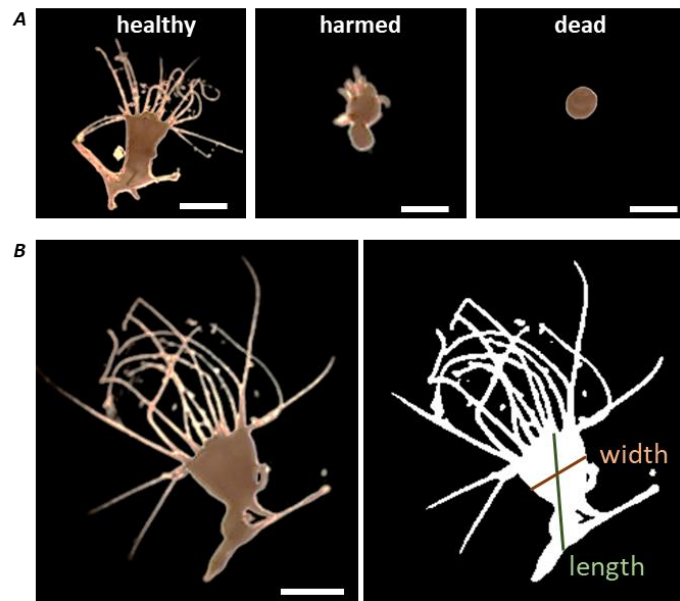

**Fig. S1: Monitoring polyp fitness traits survival and growth.** (A) Polyps categorized as healthy, harmed, and dead based on their phenotypical appearance. Healthy and harmed are alive polyps. (B) Example original photograph of an alive polyp (left panel) and its black/white projection (right panel) showing the axes for length and width measurement of the calyx.
